# Supplementary material for: Geochemical transition zone powering microbial growth in subsurface sediments
Source: PubMed Central journal article supplement (PMC7768721; doi:10.1073/pnas.2005917117), 2020-12-07
Supplement: pnas.2005917117.sapp.pdf [file pnas.2005917117.sapp.pdf]

1  
2  
3  
4  
5  
6  
7 Supplementary Information for  
8

9 **Geochemical transition zone powering microbial growth in subsurface**  
10 **sediments**

11  
12 Rui Zhao<sup>1,2\*</sup>, José M. Mogollón<sup>3</sup>, Sophie S. Abby<sup>4,+</sup>, Christa Schleper<sup>4</sup>, Jennifer F. Biddle<sup>2</sup>, Desiree  
13 Roerdink<sup>1</sup>, Ingunn H. Thorseth<sup>1</sup>, and Steffen L. Jørgensen<sup>1\*</sup>  
14

15 \* Correspondence: Rui Zhao, [ruizhao@udel.edu](mailto:ruizhao@udel.edu) Or Steffen L. Jørgensen, [steffen.jorgensen@uib.no](mailto:steffen.jorgensen@uib.no)  
16  
17

18 **This PDF file includes:**  
19

20       Supplementary Text  
21       Figures S1 to S12  
22       Tables S1 to S6  
23       Legends for Datasets S1-S2  
24       SI References  
25

26 **Other supplementary materials for this manuscript include the following:**  
27

28       Datasets S1  
29       Datasets S2  
30  
31

32  
33  
34  
35  
36

37 **Supplementary Text**

38 **Model parameterization and sensitivity analysis**

39 Due to the environmental and spatial heterogeneities of marine sediments, model parameters can vary over  
40 many orders of magnitude [*e.g.* (1, 2)]. These parameters include kinetic-related rate constants that drive  
41 internal transformations and boundary conditions (*e.g.* fluxes) that control inputs and outputs from the  
42 system. While most parameters used in our model were similar to those applied in reaction-transport  
43 modeling of other deep-sea sediments (3-6), the degradation constants of the most labile organic matter  
44 ( $k_{fox}$ ), were significantly lower than those used in the above mentioned studies (Table S4). This is not  
45 surprising, as the reactivity of organic carbon is very complex and depends on a range of factors that  
46 include the chemical nature of organic compounds together with the biogeochemical characteristics of the  
47 hosting environment (7). For this reason, a thorough review of modeling studies for organic matter  
48 degradation kinetics found very limited transferability of its kinetic parameters across sites (1). We  
49 performed a sensitivity analysis, by varying  $k_{fox}$  in the range of 10-fold to 1/10-fold of the baseline value  
50 ( $6.9 \times 10^{-5} \text{ yr}^{-1}$ ), to verify our choice of this particular parameter. As shown in Fig. S12, increasing or  
51 decreasing the  $k_{fox}$  value can dramatically change the simulation results and failed to reproduce the  
52 measured porewater profiles, while using the baseline value (used in the model results present in Fig. 2) can  
53 produce good matches with the measured porewater profiles.

54 From this sensitivity analysis, it is also obvious that varying a single parameter can cause  
55 significant changes of multiple model simulation results, due to the nature of the intertwined reactions  
56 considered in the model. While it is possible to use Monte Carlo analysis (8) or similar quantitative  
57 goodness to estimate the uncertainties for models fitting individual profiles, it is not practical to do so for  
58 models that are calibrated based on multiple measured profiles, because it is difficult to determine (1)  
59 which profile(s) should be prioritized in the error minimization and (2) the distribution range of each  
60 parameter over which to perform the random sampling. Therefore, our model parameters were largely  
61 determined by visual comparisons of the best possible fits of all the fix measured solutes/solids profiles  
62 (TOC, DIC,  $O_2$ , Mn(II),  $NO_3^-$ , and  $NH_4^+$ ), as previous studies using similar model architectures (3-5, 9).  
63 This follows as each profile inherently contains both a measurement and a modeling error (based on the  
64 numerical representation of its processes and its subsequent parameterization), which could be normalized

65 with weighting procedures, but that would inherently introduce a bias. Instead, we calculated the root mean  
66 square error (RMSE) of the modeled and measured profiles of O<sub>2</sub>, Mn(II), NO<sub>3</sub><sup>-</sup>, NH<sub>4</sub><sup>+</sup>, and DIC in the four  
67 AMOR cores. RMSEs of NO<sub>3</sub><sup>-</sup> and NH<sub>4</sub><sup>+</sup> support that our model provides a good simulation of the N  
68 cycling processes in these sediments (Table S5).

69 The modeled TOC concentrations failed to match with those measured values at the most surface  
70 sediments, which could be due to the absences or measurement errors of TOC in samples in the uppermost  
71 10-30 cm (Fig. 2a). In addition, the exponentially-decreasing TOC profiles given by our model also  
72 deviated from the discrete elevations of measured TOC in the subsurface (Fig. 2a). These TOC elevations  
73 may represent temporal changes of organic matter fluxes over millennia and are difficult to capture by our  
74 model, in which organic matter deposition was assumed to operate with a constant flux (*i.e.* at steady state).

75

#### 76 **Potential measurement errors and error propagation**

77 Due to limited amounts of extracted porewater and multiple solutes to be measured, only one measurement  
78 was done for each of the geochemical items (See the supplementary data S2 for the comprehensive raw  
79 data). Also, the O<sub>2</sub> measurement is extremely vulnerable to potential air intrusion during the measurement.  
80 Therefore, the O<sub>2</sub> concentration measurement at each depth was performed only one time in a short  
81 duration to prioritize accurate profiles. However, because the measured geochemical profiles were mainly  
82 used to calibrate the reaction-transport model and to predict the NATZ position and first-order estimates of  
83 anammox reaction rates, the unconstrained measurement errors could not substantially affect the model  
84 predictions. If measurement errors only occur for depths where solutes are measurable, our measured  
85 profiles can provide reliable indications where solutes are not measurable. For instance, nitrate-depletion  
86 depth can be easily recognized, which is always associated with NATZ and anammox rate maxima, as  
87 indicated by the sensitivity analysis.

88 All gene abundances were determined in triplicate via qPCR, and the standard deviations are  
89 presented using horizontal error bars in Fig. 2g and Fig. S11. The standard deviation of the qPCR  
90 propagates to cell-specific metabolic rates; however, all within the same order of magnitude and should not  
91 affect the overall conclusions on cell-specific rates.

92

## 93 **Materials and Methods**

94

### 95 **Study area, sampling, and geochemical measurements**

96 Sediment cores used in this study were retrieved using a gravity corer from the seabed of the Arctic Mid-  
97 Ocean Ridge (AMOR) with water depths of 1653 – 3007 m, during the CGB Summer Cruise 2014 (GC08  
98 and GC09) and 2016 (GC04 and GC05) onboard the Norwegian *R/V G.O. Sars*. GC04 (3.1-m long; 2,668  
99 m water depth) and GC05 (3.5-m long; 3,007 m water depth) were collected from the middle section of the  
100 Knipovich Ridge, while GC08 (3.4-m long; 2,476 m water depth) and GC09 (2.0-m long; 1,653 m water  
101 depth) were collected from the central and northeastern end of the Mohns Ridge, respectively (Figure 1a  
102 and Table S1). Cores were taken from areas without known hydrothermal activity. Retrieved cores were  
103 immediately sectioned into 1.5-m-long whole round cores and split in halves upon arriving on deck.  
104 Oxygen concentrations were measured immediately using a needle-type fiber-optic oxygen microsensor  
105 (PreSens, Regensburg, Germany) inserted manually into the sediments. The optode sensors were connected  
106 to a MICROX TX3 single channel fibre-optic oxygen meter, which was calibrated according to the  
107 manufacturer's protocols (PreSens, Regensburg, Germany). Pore water extractions were conducted with  
108 Rhizons samplers (10), from each of the 5 cm interval in the first half meter and 25 or 30 cm interval below  
109 that depth. Microbiology subsamples were taken simultaneously with porewater extraction, by using sterile  
110 10 ml cut-off syringes from nearly identical depths as the porewater extraction, and immediately frozen at -  
111 80°C for onshore-based DNA analysis.

112 Nutrient concentrations in porewater were measured onboard. Concentrations of ammonium  
113 ( $\text{NH}_4^+$ ), nitrate ( $\text{NO}_3^-$ ) and dissolved inorganic carbon (DIC) were analyzed colorimetrically by a Quatro  
114 continuous flow analyzer (SEAL Analytical Ltd, Southampton, UK), following the manufacturer's  
115 protocol. The photometric indophenol method was used for ammonium measurement (11). Nitrate was  
116 reduced to nitrite by a Cu-Cd reduction coil, and detected as a red complex (12). The protocol for DIC was  
117 based on ref. (13). Chloride ( $\text{Cl}^-$ ) and sulfate ( $\text{SO}_4^{2-}$ ) were measured by a Metrohm ion chromatography  
118 system. Porewater samples for metal concentrations (including Mn(II) and Fe(II)) were acidified by  
119 ultrapure nitric acid to a final concentration of 3 vol%, and stored in acid-cleaned HDPE bottles at 4°C until  
120 analysis. Metal concentrations were determined by Thermo Scientific iCap 7600 ICP-AES (inductively  
121 coupled plasma atomic emission spectrometry) at the University of Bergen. Quantification was done by

122 external calibration curves (multi element standard solutions prepared from certified single element  
123 solutions from Spectrapure) and Sc was used for internal standardization. For quality control and  
124 monitoring the performance during the analytical runs, the synthetic water CRM SPS-SW-2 (Spectrapure  
125 Standards AS) was analyzed repeatedly through the run. For additional control an in-house seawater  
126 standard was used.

127 Porosity was calculated as the weight loss of 1 cm<sup>3</sup> sediment after drying at 95°C for 24 hours,  
128 assuming a dry sediment density of 1.6 g cm<sup>-3</sup>. Dried sediments were also used for total organic carbon  
129 (TOC) and nitrogen (TON) measurements on an element analyzer (Analytikjena multi EA<sup>®</sup> 4000, Jena,  
130 Germany), after inorganic carbon removal by adding 1 mL of phosphoric acid.

131

### 132 **Diffusive flux calculation**

133 Diffusive fluxes of nitrate and ammonium into the NATZ of all cores were calculated based on the  
134 measured profiles using Fick's first law of diffusion:

$$J = \varphi \times D_s \times \delta[C]/\delta z$$

135 where,  $J$  is the flux;  $\varphi$  is the measured sediment porosity;  $D_s$  is sedimentary diffusion coefficient for a given  
136 solute (m<sup>2</sup>.yr<sup>-1</sup>) calculated using the  $R$  package *marelac* (14);  $z$  is the sediment depth below the seafloor  
137 (m); and  $\delta[C]/\delta z$  equals the solute (NO<sub>3</sub><sup>-</sup> or NH<sub>4</sub><sup>+</sup>) concentration gradient (mmol.m<sup>-3</sup>), calculated from  
138 nearby three data points.

139

### 140 **Reaction-transport modeling**

141 We used a one-dimensional reaction transport model (3, 4) to simulate the depth profiles of relevant solutes  
142 in porewater and organic carbon content in solid phase. In this study, the species explicitly modeled include  
143 oxygen, nitrate, ammonium, Mn(II), and dissolved inorganic carbon (DIC) in aqueous phase, and total  
144 organic carbon (TOC, expressed in weight percent wt%) and manganese oxide (MnO<sub>2</sub>) in the solid phase.  
145 The model considers two sets of reactions: 1) the primary reactions involved in the organic matter  
146 degradation: aerobic degradation ( $R_1$ ), heterotrophic denitrification ( $R_2$ ), and MnO<sub>2</sub> reduction ( $R_3$ ); 2) and  
147 the secondary reactions including nitrification ( $R_4$ ), Mn(II) oxidation with oxygen ( $R_5$ ) and anammox ( $R_6$ ).

148 Model simulations assume that the geochemical profiles, including all implicit reactive intermediates, are  
149 near steady state.

150 Organic matter in the model was regarded to consist of 3 discrete components (the so-called 3-G  
151 model(15)), with the first two as the reactive ones and the third one as non-reactive. Aerobic respiration  
152 ( $R_1$ ) was considered as the most favorable pathway of organic matter consumption, followed by  
153 heterotrophic denitrification ( $R_2$ ) that is limited by nitrate concentration and inhibited by oxygen, and  $MnO_2$   
154 reduction ( $R_3$ ) that is limited by  $MnO_2$  concentration and inhibited by both oxygen and nitrate, implemented  
155 through serial inhibition terms (3). Secondary reactions ( $R_4$ - $R_6$ ) were represented through bimolecular  
156 kinetics, except for anammox which was also inhibited by oxygen. As nitrite is a highly active intermediate  
157 of multiple N cycle pathways, it was not explicitly simulated due to its rapid reactivity. Therefore, the  
158 model assumes the anammox reaction to be a reaction between  $NH_4^+$  and  $NO_3^-$  following Mogollon et al  
159 (3). The C/N stoichiometry of the degraded organic matter was taken as the TOC/TON ratio. Diffusion  
160 coefficients were calculated as a function of the temperature (1 °C) and salinity (35 Practical Salinity Unit  
161 (PSU)) using the R package *marelac* (14). As boundary conditions (Table 3), the model is constrained by  
162 fixed concentrations of  $O_2$ ,  $NH_4^+$ ,  $NO_3^-$ , DIC, Mn(II), and fixed organic matter flux at the sediment-water  
163 interface, and zero gradient conditions at the lower boundary of the sediment domain indicated in Table S3.  
164 The remaining model parameters (Table S4) were calibrated by comparing the model simulation outputs  
165 against the measured depth profiles of  $O_2$ ,  $NH_4^+$ ,  $NO_3^-$ , DIC, Mn(II), and TOC (Fig. 2) until satisfied visual  
166 fits for all profiles were reached.

167 The numerical solution for the partial differential equations was implemented in R following the  
168 approach outlined in Soetaert and Meysman (16). In short, the spatial derivatives of the partial differential  
169 equations were expanded as a finite difference grid (200 equidistant layers over the sediment domain of 10  
170 cm). After discretization, the resulting set of ordinary differential equations was integrated using the stiff  
171 equation solver *ode* implemented in R through the *deSolve* package (17). We calculate the root mean square  
172 error (RMSE), the square root of the sum of the squared differences between modeled and measured  
173 values, for  $O_2$ , Mn(II),  $NO_3^-$ ,  $NH_4^+$ , and DIC, to assess the goodness of our model simulations.

174

175 **Global occurrence of NATZ in global marine sediments**

176 Geochemical profiles indicating a nitrate-ammonium transition zone (NATZ) in marine sediments (*i.e.*, the  
177 narrow overlap interval where downward diffusing nitrate encounter the upward diffusing ammonium)  
178 were previously reported in the literature [*e.g.*, (18-31)]. Nitrate and ammonium profiles were obtained  
179 directly from these publications using the online tool WebPlotDigitizer  
180 (<http://automeris.io/WebPlotDigitizer>), when not available in public databases. Additional sediment nitrate  
181 and ammonium profiles were obtained from the PANGAEA database ([www.pangaea.de](http://www.pangaea.de)) by searching  
182 using a combination of the following key words: “marine sediment”, “ammonium”, and “nitrate”.  
183 Porewater profiles of ammonium and nitrate were manually checked and those containing too few  
184 datapoints (<6) were discarded. All sites harboring a clear NATZ were included in the global map prepared  
185 using GeoMapApp (32).

186

### 187 **Calculation of Gibbs free energy and power supply of anammox**

188 The standard Gibbs free energy ( $\Delta G_r^0$ ) was calculated using the thermodynamic data of standard Gibbs free  
189 energy of formation of each reactant/product that corrected to near *in situ* pressure and temperature in the R  
190 package *CHNOSZ* (33). Gibbs free energy of anammox ( $\Delta G_r$ ) was then calculated following the description  
191 in LaRowe and Amend (34), using the equation:

$$\Delta G_r = \Delta G_r^0 + RT \times \ln Q_r$$

192 where  $Q_r$  refer to reaction quotient of anammox reaction,  $R$  represents the gas constant (*i.e.* 8.314 J mol<sup>-1</sup> K<sup>-1</sup>),  
193 and  $T$  denotes temperature in Kelvin. Both the measured profiles and the model fits were used in this  
194 calculation. Note that NH<sub>4</sub><sup>+</sup> concentrations above the NATZs and NO<sub>3</sub><sup>-</sup> concentrations below the NATZs  
195 were below detection limit but were arbitrarily set at 0.01 μM to allow the calculation. N<sub>2</sub> concentrations  
196 in the sediment porewater were not measured, but assumed to be constant at 0.625 mM throughout the  
197 cores, according to a handful of N<sub>2</sub> concentration measurements in marine anoxic sediments (35, 36). Final  
198 values were expressed in kJ per mole of electron transferred, kJ (mol e<sup>-</sup>)<sup>-1</sup>, assuming six electrons  
199 transferred per anammox reaction.

200 Following the notion proposed in LaRowe and Amend (34), the power supply of anammox  
201 reaction,  $P_s$ , is calculated using the following equation:

$$P_s = \Delta G_r \times R_{anammox}$$

202 where  $\Delta G_r$  is the Gibbs free energy of anammox,  $R_{anammox}$  is the anammox rate predicted from the reaction-  
203 transport model.

204

#### 205 **DNA extraction**

206 DNA for amplicon sequencing and qPCR was extracted from ~0.5 gram of sediment per sample using the  
207 PowerLyse DNA extraction kits (MOBIO Laboratories, Inc.) with the following minor modifications: 1)  
208 Lysis tubes were replaced by G2 tubes (Amplikon, Odense, Denmark), and 2) water bathed for 30 min at  
209 60 °C prior to bead beating (speed 6.0 for 45 seconds) using a FastPrep-24 instrument (MP Biomedicals). A  
210 blank extraction was carried out in parallel with each extraction batch (including ~15-25 samples from the  
211 same core) following the same procedure without sediment addition. The DNA was eluted into 80  $\mu$ L of  
212 molecular grade double-distilled H<sub>2</sub>O (ddH<sub>2</sub>O) and stored at -20 °C until analysis. DNA for metagenomic  
213 sequencing was extracted from ~ 7 g sediment (0.7 g sediment in 10 individual lysis tubes) of each of the  
214 four selected horizons in core GC08 following the procedure described above, except the final elution step:  
215 The DNA extracts from each sample were iteratively eluted from the 10 spin columns into 100  $\mu$ L of  
216 ddH<sub>2</sub>O for further analysis.

217

#### 218 **Amplicon sequencing and sequence analysis**

219 16S rRNA genes were amplified using the primer pair 515F/806R in a two-round amplicon preparation,  
220 with an optimal PCR cycle number in the first round to minimize over-amplification., Amplicon libraries  
221 were sequenced on an Ion Torrent Personal Genome Machine. Sequencing reads were quality filtered and  
222 trimmed to 220 bp using the USEARCH pipeline (37) and chimera were detected and removed using  
223 UCHIME. Trimmed reads were clustered into operational taxonomy units (OTUs) at >97% nucleotide  
224 sequence identity using UPARSE (38). Most of the OTUs detected in the extraction blanks (negative  
225 controls) were manually removed, except for a few OTUs that may be introduced into the blanks by cross-  
226 contamination. Overall, >99.9% of reads in the negative controls were removed. Samples were subsampled  
227 to 20,000 reads for each sediment horizon. The taxonomic classification of OTUs was performed using the  
228 lowest common ancestor algorithm implemented in the CREST package (39) with the SilvaMod128  
229 database (September 2016 release) as reference. The relative abundance of anammox bacteria was taken as



230 the sum of the percentages of *Candidatus Scalindua* OTUs in the total communities, and visualized in  
231 heatmaps generated using the *R* package *ggplot2* (40).

232

### 233 **Quantification of total microbial community and anammox bacteria**

234 Abundances of anammox bacteria was quantified using qPCR by targeting the *hzo* gene (encoding the  
235 hydrazine dehydrogenase responsible for the degradation of hydrazine to N<sub>2</sub>) using the primer pair  
236 *hzoF1/hzoR1* (41) following the procedure described elsewhere (6). The abundances of denitrifying  
237 bacteria were quantified by targeting the *narG* (coding the periplasmic nitrate reductase alpha subunit), *nirS*  
238 and *nirK* genes (coding cytochrome cd1- and Cu-containing nitrite reductases, respectively), using the  
239 protocol described in (6). In addition, archaeal and bacterial 16S rRNA genes were quantified as described  
240 in (42). Total cell abundance was estimated from 16S rRNA gene copies, assuming 5.0±2.9 copies of 16S  
241 rRNA genes for each bacterial genome, and 1.7±0.9 copies in each archaeal genome (43). Anammox  
242 abundance was also calculated as the product of the total cell abundance and the percentage of the genus of  
243 *Candidatus Scalindua* in the total community assessed by amplicon sequencing (see description below). All  
244 gene abundances were determined in triplicate by qPCR, and standard deviations are presented using  
245 horizontal error bars in Fig. 2g and Fig. S11.

246

### 247 **Cell-specific rate of anammox**

248 We estimated cell-specific metabolic rates from the bulk anammox rate given by the reaction-transport  
249 model divided by the anammox abundance measured by *hzo*-based qPCR. This calculation was limited to  
250 sediment horizons within the NATZ in each core, because anammox bacteria abundances were rarely  
251 detected outside the NATZ (Fig. 2g). To facilitate the direct comparison with *E. coli* (44), the cell-specific  
252 metabolic rate (in units of fmol NH<sub>4</sub><sup>+</sup> cell<sup>-1</sup> d<sup>-1</sup>) were converted to cell-specific proton pumping rate (in the  
253 unit of protons cell<sup>-1</sup> s<sup>-1</sup>), assuming four mols of protons were transferred per mol of NH<sub>4</sub><sup>+</sup> oxidized by  
254 anammox bacteria for establishing the proton motive force (45).

255

### 256 **Metagenomic sequencing and analysis**

257 DNA was sheared into 400 bp fragments using Covaris, and paired-end libraries were constructed using a  
258 Nextera DNA Flex Library Prep kit (Illumina). Metagenomic libraries were sequenced (2×150 bp) by an  
259 Illumina Hiseq 2500 sequencer at the Vienna Biocenter Core Facilities GmbH (Vienna, Austria). The  
260 quality of the reads and presence of adaptor sequences were checked using FastQC v.0.11.5 (46). Then the  
261 sequencing data were processed with Trimmomatic v.0.36 (47) to trim read-through adapters  
262 (ILLUMINACLIP:TruSeq2-PE.fasta:2:30:10), trim low quality base calls at the starts and ends of reads  
263 (LEADING:3, TRAILLING:3), remove reads that had average phred score lower than 25 in a sliding  
264 window of 10 bp (SLIDINGWINDOW:10:25), and finally remove reads shorter than 100 bp (MINLEN:100).  
265 The overall quality of processed reads was evaluated in a final check with FastQC v.0.11.5, to ensure only  
266 high-quality reads were used in the downstream analysis.

267

### 268 **Assembly and genome binning**

269 The quality-controlled paired-end reads were *de novo* assembled into contigs using Megahit v.1.1.2 (48)  
270 with the k-mer length varying from 27 to 117. Contigs larger than 1000 bp were binned with MaxBin2  
271 v2.2.5 (49) using the default parameters. The quality of the obtained genome bins was assessed using the  
272 option “lineage\_wf” of CheckM v.1.0.7 (50), which uses lineage-specific sets of single-copy genes (SCGs)  
273 to estimate completeness and contamination and assigns contamination to strain heterogeneity if amino acid  
274 identity is >90%. Genome bins of >50% completeness were manually refined using the gbtools (51) based  
275 on the GC content, taxonomic assignments, and differential coverages in different samples. Coverages of  
276 contigs in each sample were determined by mapping trimmed reads onto the contigs using BMap v.37.61  
277 (52). Taxonomy of contigs were assigned according to the taxonomy of the single-copy marker genes in  
278 contigs identified using a script modified from blobology (53) and classified by BLASTn (54). SSU rRNA  
279 sequences in contigs were identified using Barrnap (55), and classified using VSEARCH (56) with the  
280 SILVA 132 release (57) as the reference. To improve the quality of the genome of *Ca. Scalindua sedimins*,  
281 the metagenome reads of the sample GC08\_160cm were mapped onto the contigs using BMap (52), and  
282 the aligned reads were re-assembled using SPAdes v.3.12.0 (58). After manual removal of contigs shorter  
283 than 1000 bp, the resulting scaffolds were visualized and re-binned using gbtools (59) as described above.

284 The quality of the resulting *Scalindua* genome was checked using the CheckM “lineage\_wf” command  
285 again, based on the Planctomycetes marker gene set (automatically selected by CheckM).

286

### 287 **Genome annotation**

288 Genes in the genome of *Ca. Scalindua sediminis* were predicted using Prodigal (60). Genome annotation  
289 was conducted using Prokka v.1.13 (61), eggNOG (62), and BlastKoala (63) using the KEGG database.

290 The functional assignments of genes of interest were also confirmed using BLASTp against the NCBI  
291 RefSeq database. Metabolic pathways were reconstructed using KEGG Mapper (64).

292

### 293 **Phylogenetic analyses**

294 All available high-quality anammox bacterial genomes were downloaded from the NCBI database and  
295 included in the phylogenomic analysis. The phylogenomic analysis was based on marker genes consisting  
296 of 14 syntenic ribosomal proteins (rpL2, 3, 4, 5, 6, 14, 15, 18, 22 and rpS3, 8, 10, 17, 19) that have been  
297 demonstrated to undergo limited lateral gene transfer (65). These selected proteins, among the conservative  
298 single-copy ribosomal proteins included in Campbell, *et al.* (66), were identified in Anvi'o v.5.4 (67) using  
299 Hidden Markov Model (HMM) profiles, following the procedure outlined at  
300 <http://merenlab.org/2017/06/07/phylogenomics/>. Sequences were aligned individually using MUSCLE  
301 (68), and alignment gaps were removed using trimAl (69) with the mode of “automated”. Individual  
302 alignments of ribosomal proteins were concatenated. The maximal likelihood phylogenetic tree was  
303 reconstructed using IQ-TREE v.1.5.5 (70) with LG+F+I+G4 the best-fit model selected by ModelFinder  
304 (71), and 1000 ultrafast bootstrap iterations using UFBoot2 (72) to assess the robustness of tree topology.

305 A maximum likelihood phylogenetic tree based on 16S rRNA genes was also constructed for  
306 known anammox bacteria and close relatives of the three *Scalindua* OTUs identified via BLASTn (54) in  
307 the NCBI database. Sequences were aligned using MAFFT-LINSi (73) and the maximum-likelihood  
308 phylogenetic tree was inferred using IQ-TREE v.1.5.5 with GTR+F+R3 as the best-fit substitution model  
309 and 1000 ultrafast bootstraps following the procedure described above.

310 For the phylogeny of HzsA (hydrazine synthase subunit alpha), the genomes of known anammox  
311 bacteria were downloaded from the NCBI database, annotated using Prokka v1.13 (61), and the HzsA

312 amino acid sequences were extracted. Additional HzsA sequences of uncultured anammox deposited in the  
313 NCBI database were also identified using BLASTp (54) using the HzsA sequence of *Ca. S. sediminis* as  
314 the query. Sequences were aligned using MAFFT-LINSi (73) and the maximum likelihood phylogenetic  
315 tree was inferred using IQ-TREE v.1.5.5 following the procedure described above.

316 For the phylogeny of UreC (urease alpha subunit, also the catalytic subunit), the sequence of *Ca.*  
317 *S. sediminis* was used as the query in the BLASTp (54) search in the NCBI database (>50% similarity were  
318 retained), to identify its close relatives. These sequences were aligned using MAFF-LINSi (73) with  
319 reference sequences from Koch, *et al.* (74), and complemented with known nitrifiers (*e.g.* ammonia-  
320 oxidizing bacteria (AOB) from the genera of *Nitrospira*, *Nitrosomonas*, *Nitrosococcus*, nitrite-oxidizing  
321 bacteria (NOB) from *Nitrospira* and *Nitrospina*, and ammonia-oxidizing archaea (AOA) from the  
322 Thaumarchaeota phylum). For the CynS encoding cyanase (*i.e.* cyanate dehydrogenase), the two CynS  
323 sequences of *Ca. S. sediminis* were aligned using MAFFT-LINSi (73) with reference sequences from  
324 Palatinszky, *et al.* (75) and their close relatives in GenBank identified via BLASTp given a similarity  
325 threshold of 50%. Both alignments were then trimmed using trimAl (69) with the mode of “automated”.  
326 Maximum likelihood phylogenetic trees were reconstructed using IQ-TREE v.1.5.5 (70) with the  
327 LG+C20+F+G substitution model and 1,000 ultrafast bootstraps.

328 Since the cytochrome cd1-containing nitrite reductase (NirS) was missing in the *Ca. Scalindua*  
329 *sediminis* draft genome, we searched this protein by BLASTp using the NirS of *Ca. Scalindua rubra* as the  
330 query against the coding sequences of the bulk metagenome assembly of the NATZ of GC08. The only  
331 NirS hit from the bulk assembly was aligned using MAFFT-LINSi (73) with sequences from other  
332 anammox bacteria, and their close relatives identified by BLASTp. The alignment was trimmed using  
333 trimAl (69) with the mode of “automated” and then was used to infer the maximum-likelihood  
334 phylogenetic tree using IQ-TREE v.1.5.5 with WAG+I+G4 as the substitution model and 1,000 ultrafast  
335 bootstraps. All phylogenetic trees were visualized and branches were collapsed using FigTree  
336 (<http://tree.bio.ed.ac.uk/publications/>), prior to figure preparations in CorelDraw 2019.

337

338 **Potential denitrifying bacteria in the NATZ of GC08**

339 Denitrifying bacteria can provide nitrite to anammox bacteria by reducing nitrate to nitrite using the nitrate  
340 reductase. To explore the presence and diversity of potential denitrifying bacteria in the NATZ, we  
341 extracted the NarG (nitrate reductase alpha subunit) sequences from the Prokka annotation of the GC08  
342 NATZ metagenome assembly, and used them as the queries in BLASTp to identify their close relatives in  
343 the NCBI database. All these sequences were combined with the NarG sequences of several MAGs  
344 recovered from the four metagenomes of GC08 (details about these MAGs will be presented in a separate  
345 paper), and the NarG/NxrA sequences of various denitrifiers and nitrite-oxidizing bacteria published in (76,  
346 77). All sequences were aligned using MAFFT-LINSi (73), and alignment gaps were removed using trimAl  
347 (69) with the mode of “automated”. The maximum-likelihood phylogenetic tree was reconstructed using  
348 IQ-TREE v.1.5.5 (70) with LG+R7 as the best-fit substitution model and 1,000 ultrafast bootstraps.

349

#### 350 **Comparative genomic analysis of *Scalindua***

351 Genomes of *Ca. S. rubra* (78), *Ca. S. brodae* (79), *Ca. S. japonica* (80), *Ca. S. profunda* (77), *Ca. S.*  
352 *AMX11* (81), and *Ca. S. sediminis* (recovered in this study) were included in the comparative genomic  
353 analysis using Anvio v.5.4 (67) according to the workflow described at  
354 <http://merenlab.org/2016/11/08/pangenomics-v2/>. All genomes were annotated using Prokka v.1.13 (61)  
355 and BLASTp using the Clusters of Orthologous Groups of proteins (COG) (82) as the reference database.  
356 The specific metabolic characteristics inferred from the annotations of genes with known homologs, and  
357 identified with the pangenomic analysis are discussed in the main text.

358

#### 359 **Global distribution of *Ca. S. sediminis*-like anammox**

360 The occurrence of *Ca. Scalindua sediminis*-like anammox in natural environments was assessed using  
361 IMNGS (83) with the full-length 16S rRNA gene sequence as query. Reads with length longer than 200 bp  
362 and nucleotide sequence identity higher than 97% to the query were included as matching reads. Samples  
363 with <10 matching reads were discarded. Only natural environments with a proportion of matching reads  
364 higher than 0.01% were included.

# Supplementary Figures and Tables

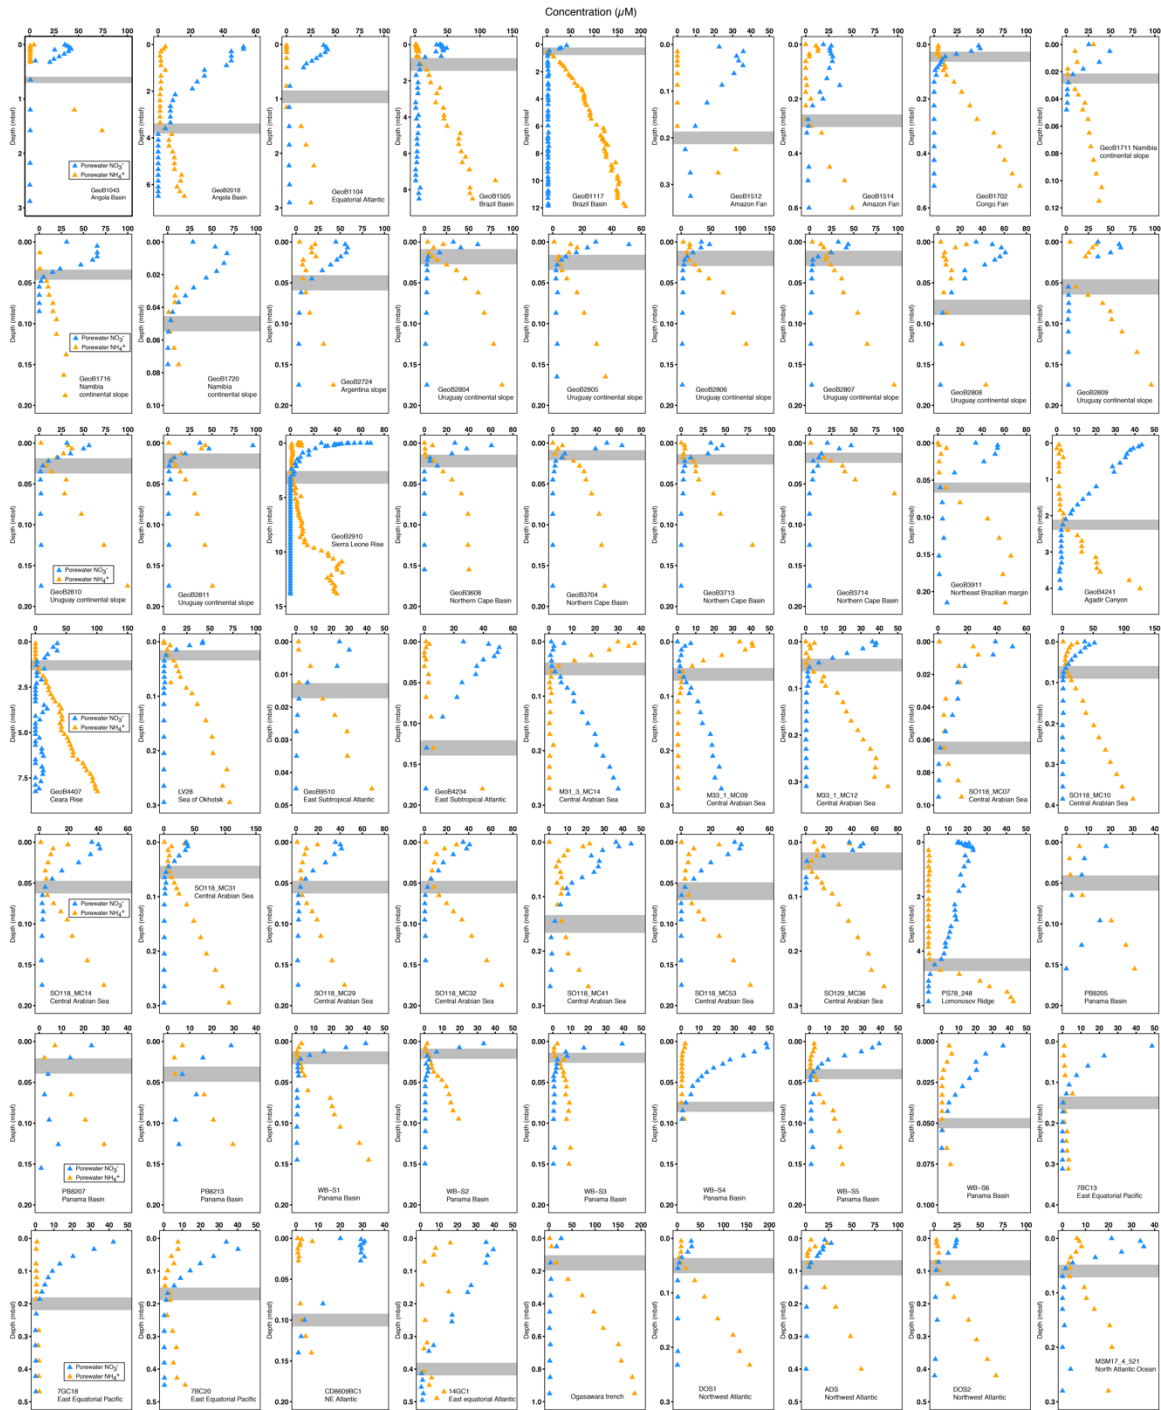

**Fig. S1. Geochemical profiles of porewater nitrate (blue) and ammonium (orange) in sediment sites bearing a NATZ highlighted by grey bars.**

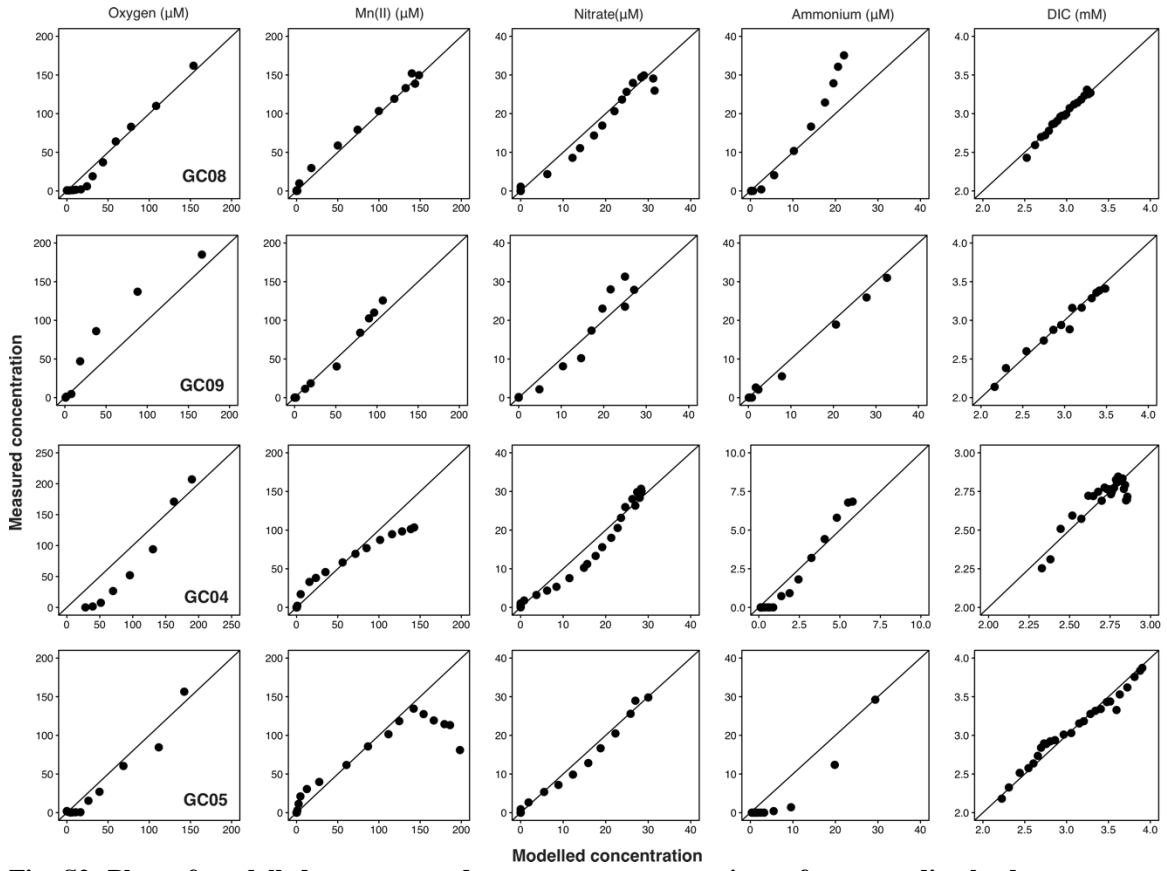

**Fig. S2.** Plots of modelled vs. measured porewater concentrations of oxygen, dissolved manganese, nitrate, ammonium, and dissolved inorganic carbon (DIC). In each plot, a reference line with a slope of 1 is also included.

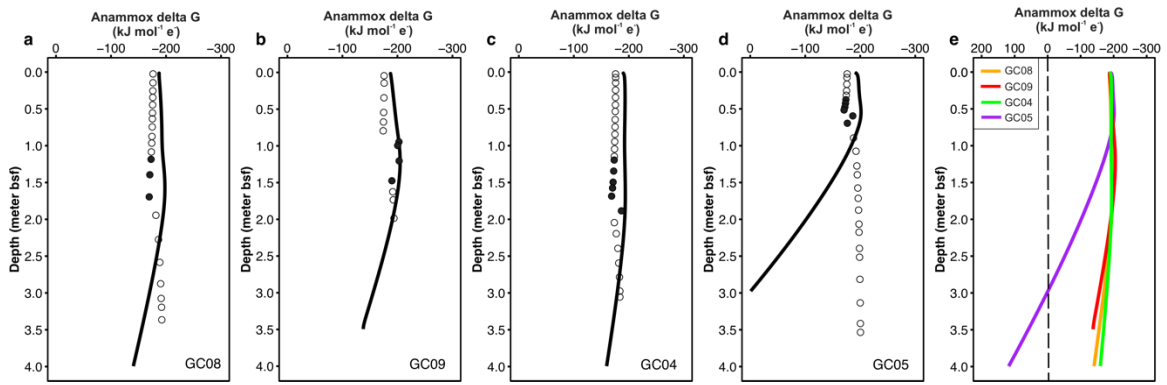

**Fig. S3. Gibbs energy of the anammox reaction in the unit of kJ per mole of electron transfer. (a-d)** Gibbs energy of the anammox reaction in individual cores. In each core, the solid line represents the calculation based on the model fits, while the circles denote those based on the measured profiles with the depths within the NATZ shown in filled circles. **(e)** A compilation of the model fits-based calculation of anammox Gibbs energy in all the four cores.



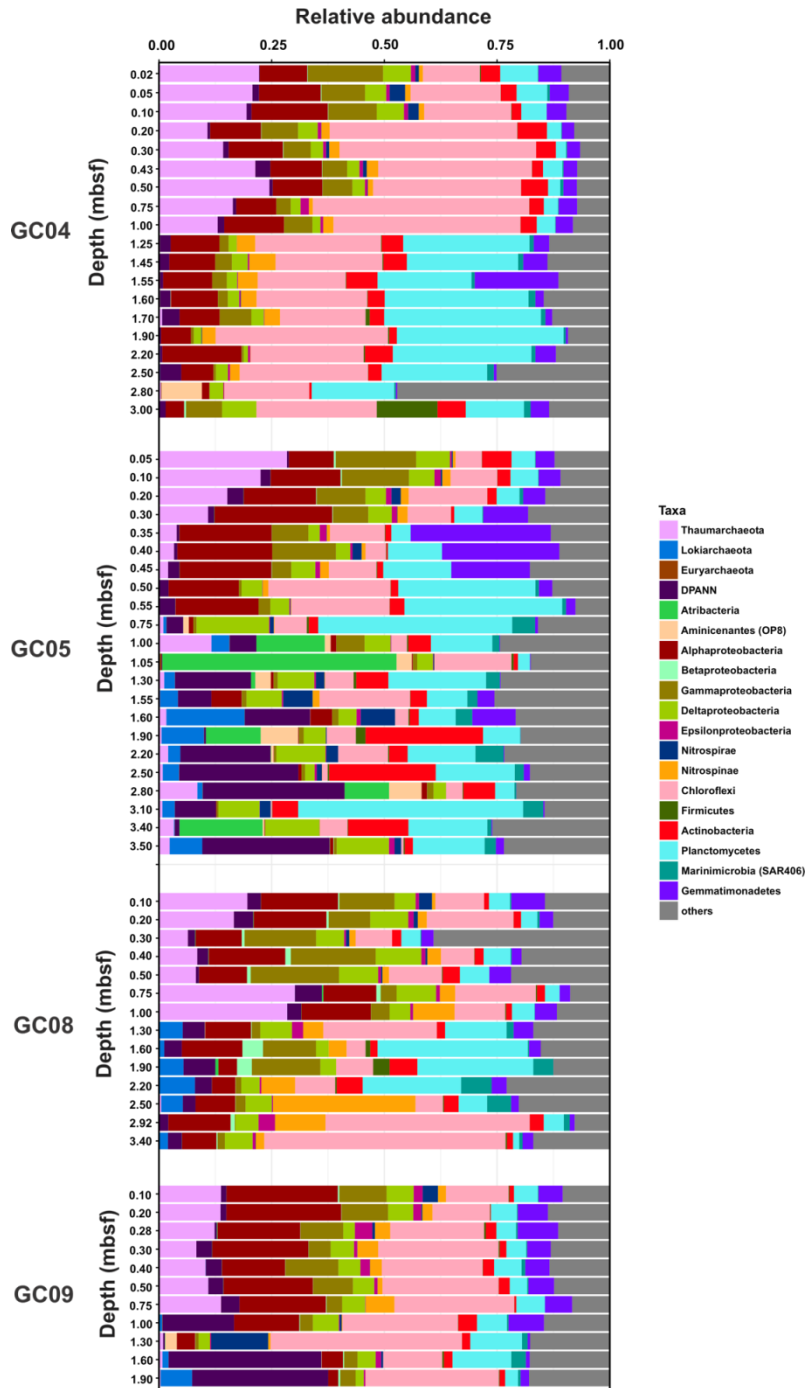

Fig. S4. Microbial communities inhabiting AMOR sediment cores assessed by 16S rRNA gene amplicon sequencing. Minor taxa were combined into the category of “others”.

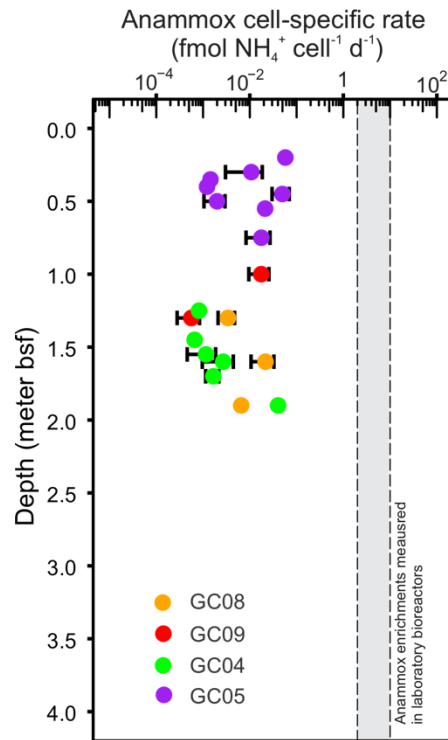

**Fig. S5. Cell-specific rates of anammox bacteria in NATZ.** Cell-specific rates of anammox were calculated by dividing the modeled bulk anammox reaction rate by the anammox cell number quantified by qPCR targeting the *hz0* gene. Error bars derived from triplicate quantification of anammox cell numbers using qPCR. The grey dashed box represents the cell-specific rate range (2-20  $\text{fmol cell}^{-1} \text{ d}^{-1}$ ; from refs. (84, 85)) of anammox bacteria enrichments measured in laboratory reactors.

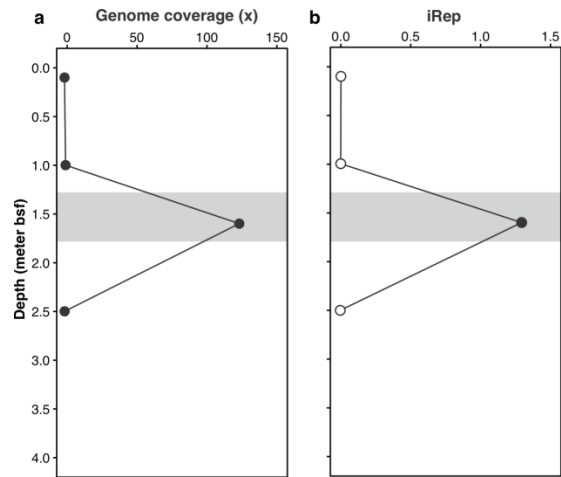

**Fig. S6. Genome coverage (a) and index of replication (iRep, b) of *Ca. Scalindua sediminis* in GC08.** In (b), iRep calculation was only possible for the NATZ depth (160 cm) due to the low genome coverages in the other three depths (iRep in the other three depths were arbitrarily assigned to zero and marked with open circles). The NATZ was marked with a grey band in both panels.

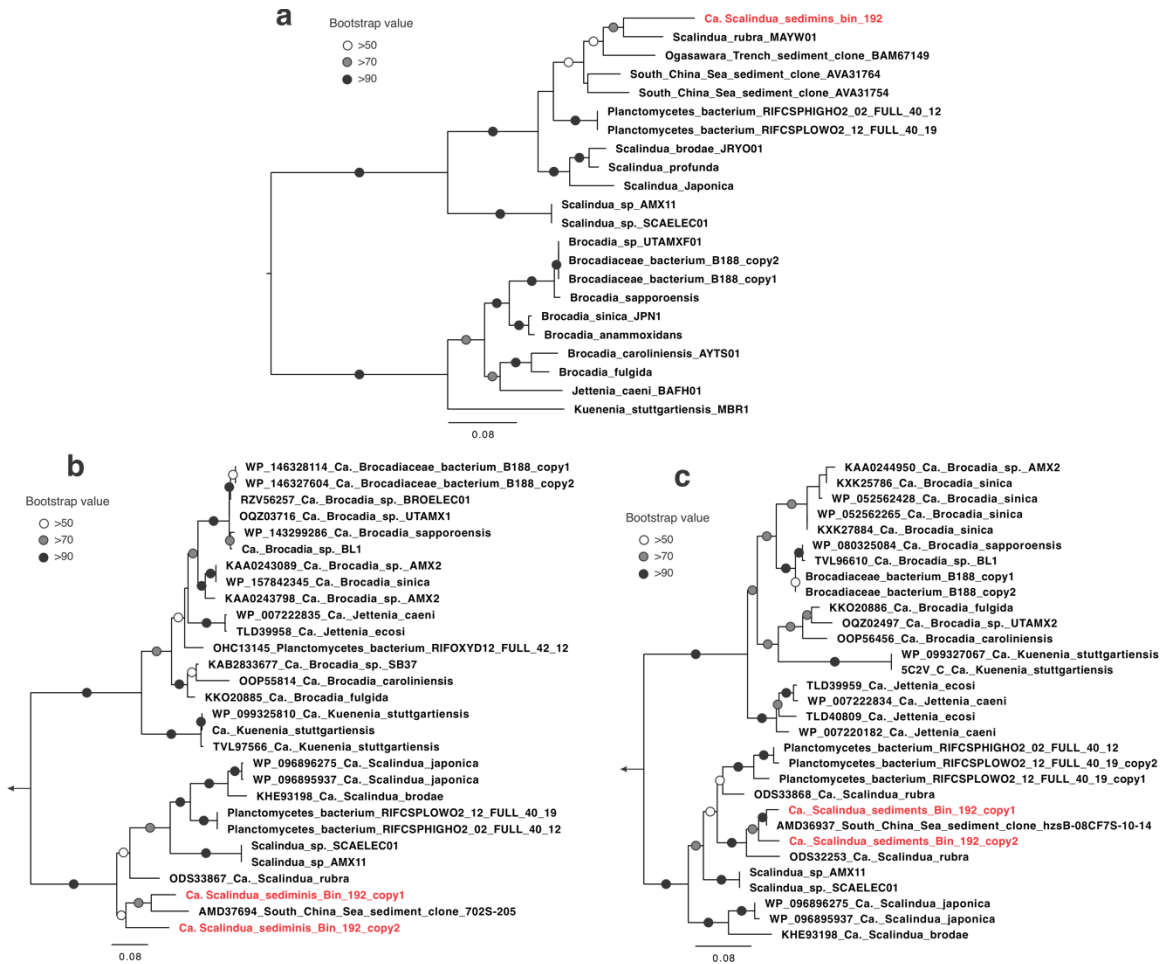

**Fig. S7. Maximum-likelihood phylogenies of anammox hydrazine synthase alpha (a), beta (b), and gamma (c) subunits.** All phylogenetic trees were reconstructed using IQ-TREE with 1000 fast bootstraps. Sequences of *Candidatus Scalindua sediminis* genome recovered in this study is highlighted in red. Bootstrap values of >50 are shown with symbols listed in the legend. The scale bars show estimated sequence substitutions per residue.

### Global occurrence map of *Ca. Scalindua sediminis*

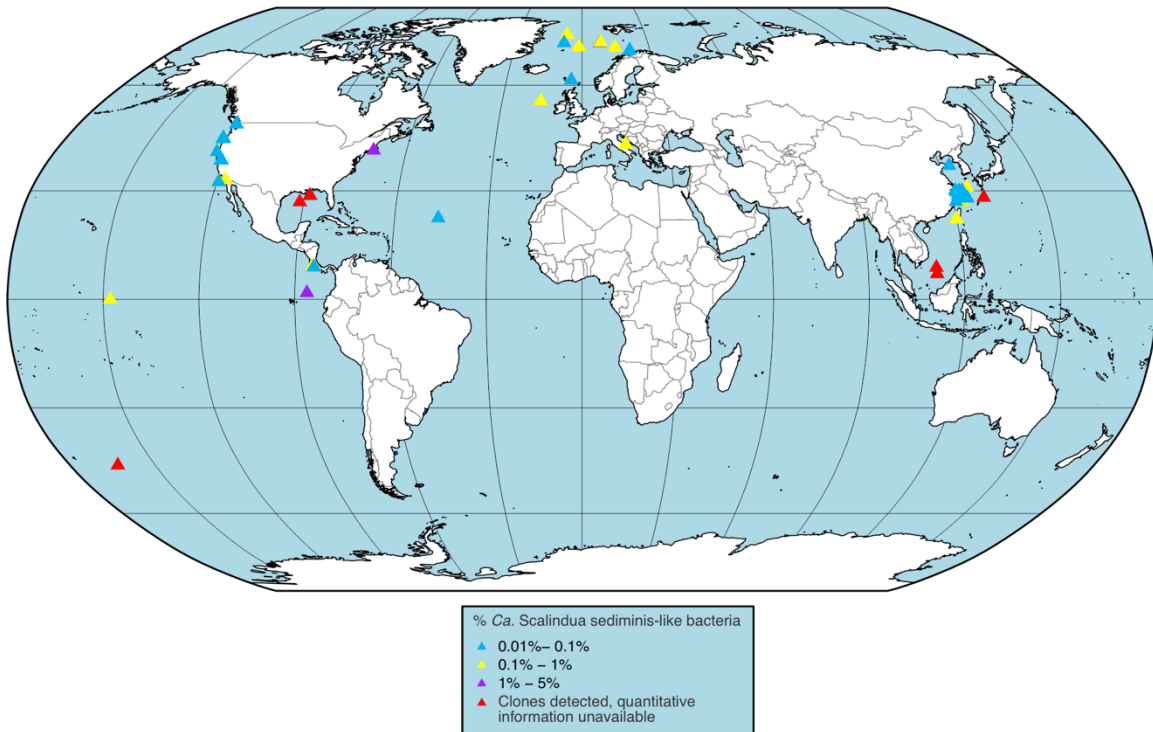

**Fig. S8. Global distribution of the *Ca. Scalindua sediminis*-like bacteria.** The map indicates sampling locations of public SRA datasets containing bacteria showed >97% similarity to the 16S rRNA gene sequence of *Ca. Scalindua sediminis*. Note that in some cases a single sampling site can represent multiple sediment depths. Relative abundance of *Ca. Scalindua sediminis*-like bacteria are shown in color-coded triangles.

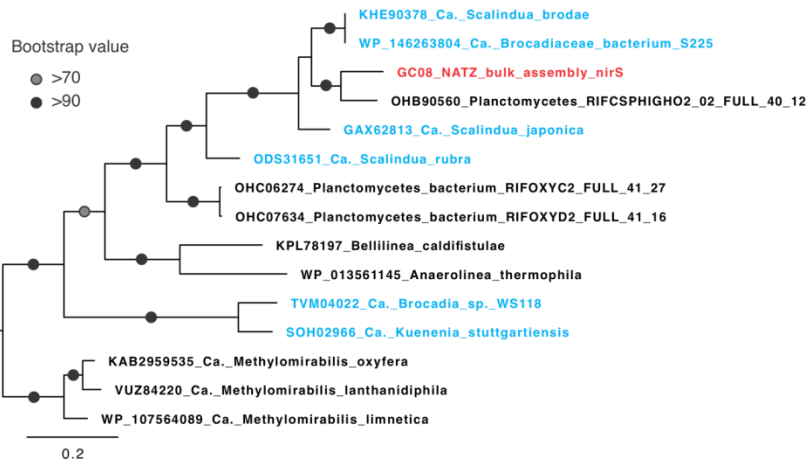

**Fig. S9. Maximum likelihood phylogenetic analysis of cytochrome *cdi*-containing nitrite reductase (NirS) of anammox bacteria.** The sequence from the metagenome assembly in the NATZ of GC08 is highlighted in red, while sequences of known anammox bacteria are shown in blue.

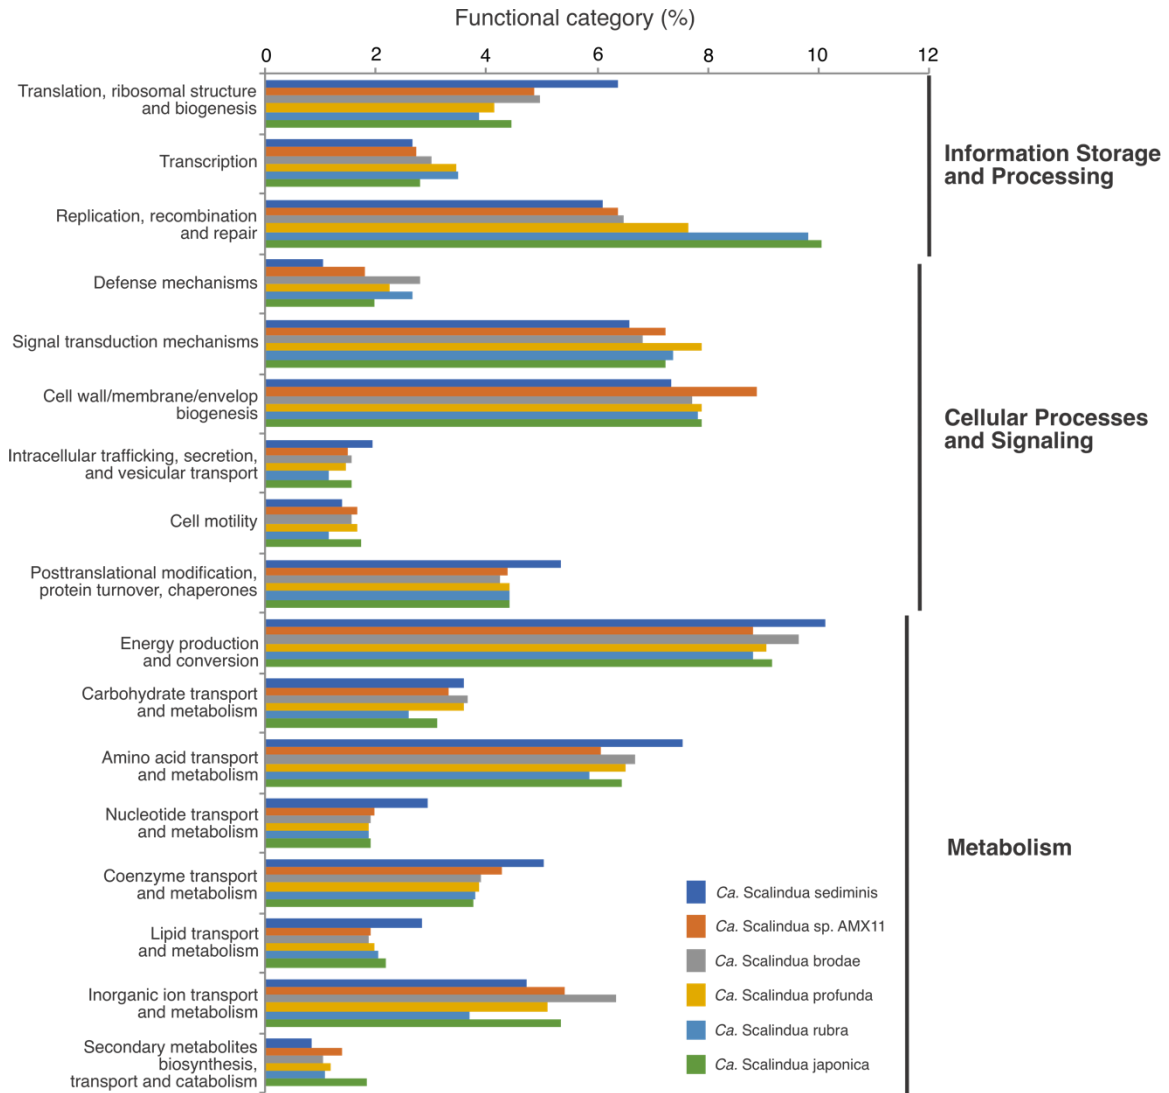

**Fig. S10. Functional classification of protein-coding genes from *Ca. Scalindua sediminis* compared to other *Candidatus Scalindua* genomes.** The bar chart represents the percentage of protein-coding genes classified by eggNOG functional categories. Functional categories below 1% were excluded.

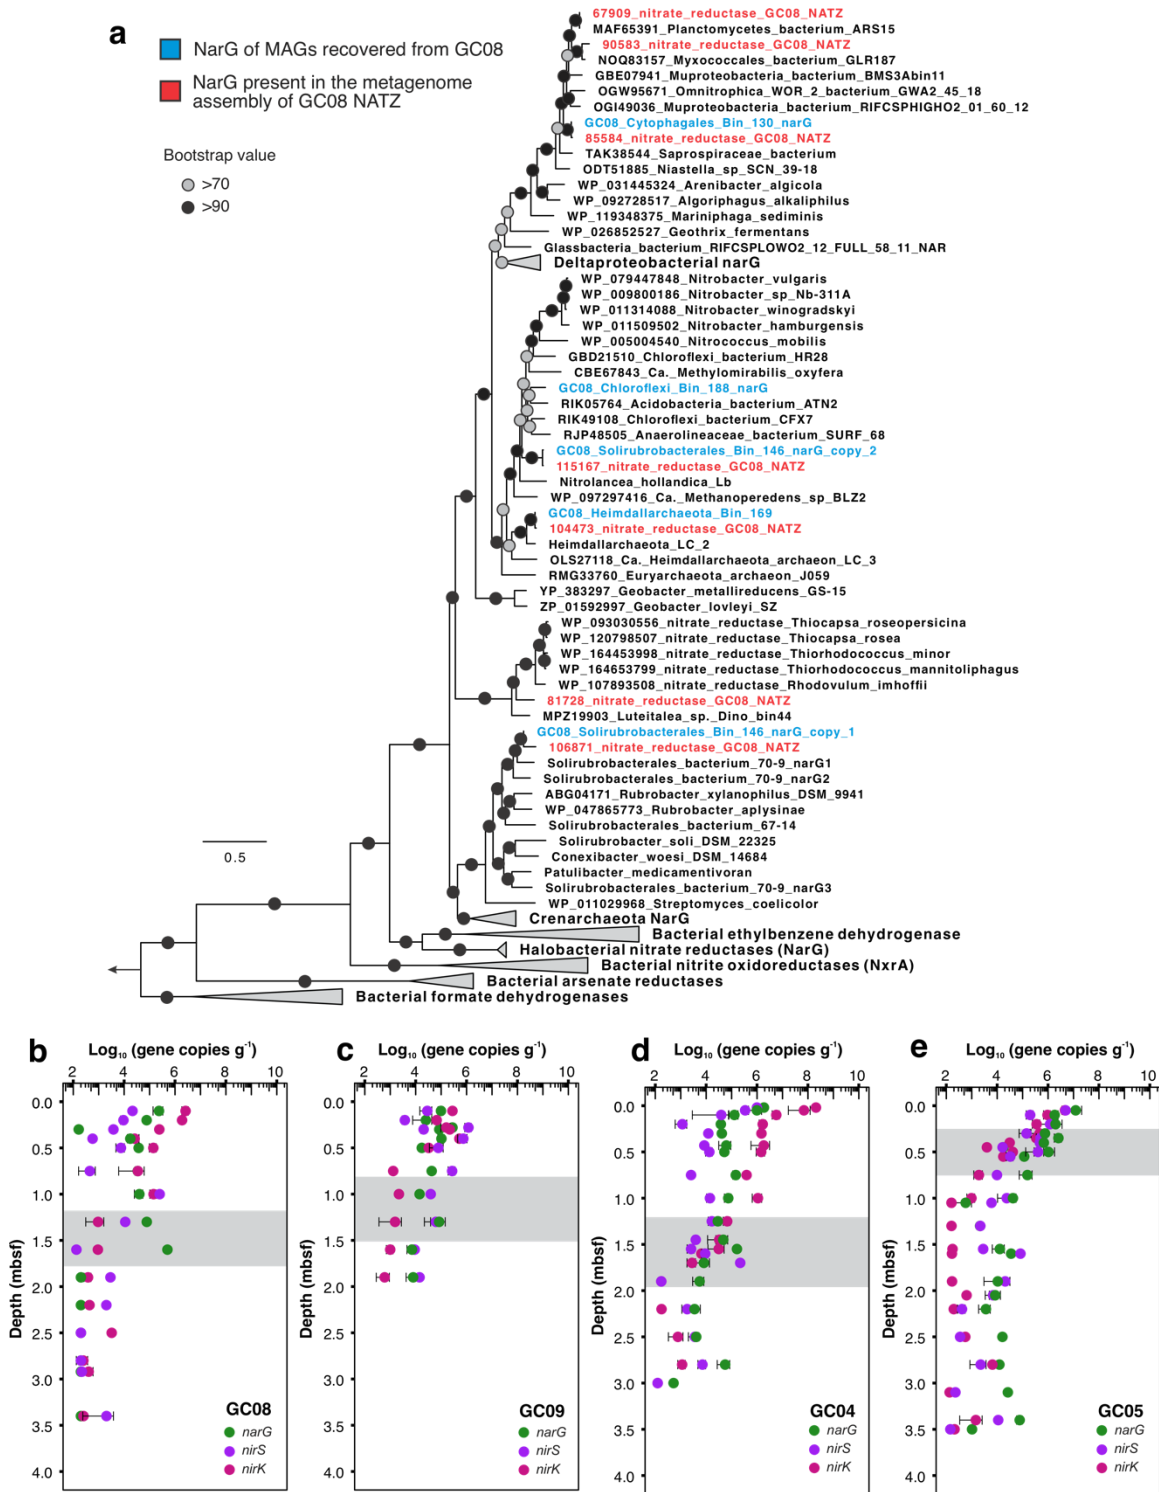

**Fig. S11. Diversity and distribution of denitrifying bacteria.** (a) Maximum-likelihood phylogenetic tree of periplasmic nitrate reductase alpha subunit (NarG) detected in the bulk metagenome assembly of the NATZ of GC08. Sequences from the metagenome assembly are highlighted in red, while those from the metagenome-assembled genomes (MAGs) of denitrifying bacteria recovered from this core are shown in blue. (b-e) q-PCR determined abundance of genes encoding nitrate reductase alpha subunit (*narG*), copper-containing nitrite reductase (*nirK*), and cytochrome *cdl*-containing nitrite reductase (*nirS*) in the four sediment cores collected from AMOR. Error bars represent standard deviations of the qPCR triplicates, and



some are smaller than the symbols and therefore are invisible. Gene abundances below detection limit were arbitrarily shown as 100 copies  $g^{-1}$ . The NATZ interval in each core is shown with a grey box.

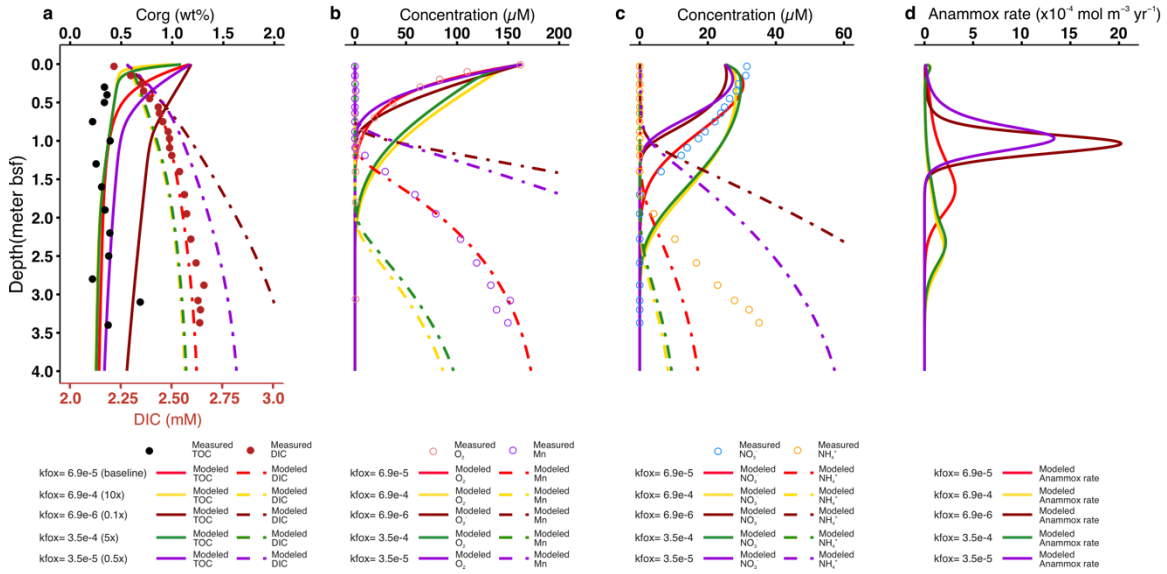

**Fig. S12. Sensitivity analysis of the degradation constant ( $k_{fox}$ ) of the labile organic matter (C1).** Profiles showed here are the measured (dots) and modeled concentrations (lines) of TOC and DIC (**a**),  $O_2$  and dissolved Mn (**b**),  $NO_3^-$  and  $NH_4^+$  (**c**), and anammox rate (**d**), with the  $k_{fox}$  of  $6.9 \times 10^{-5}$  (baseline value),  $6.9 \times 10^{-4}$  (10x of the baseline value),  $6.9 \times 10^{-6}$  (0.1x),  $3.5 \times 10^{-4}$  (5x), and  $3.5 \times 10^{-5}$  (0.5x). Scales in (**a-c**) are the same as Fig. 2a-2c, while the scale of (**d**) is different from Fig. 2d.

**Table S1. Properties of study sites considered in this study**

| <b>Sediment core</b>          | <b>GC08</b> | <b>GC09</b> | <b>GC04</b> | <b>GC05</b> |
|-------------------------------|-------------|-------------|-------------|-------------|
| Latitude (N)                  | 71°97'      | 73°70'      | 72°16'      | 76°55'      |
| Longitude (E)                 | 0°10'       | 7°34'       | 1°42'       | 7°7'        |
| Water depth (m)               | 2,476       | 1,653       | 2,668       | 3,007       |
| Organic matter content (wt %) | 0.3-0.6     | 0.2-0.5     | 0.3-1.0     | 0.3-1.8     |
| Depth of NATZ*                | 1.2-1.7     | 0.8-1.5     | 1.5-2.0     | 0.5-0.7     |
| Nitrate flux to NATZ**        | 0.27        | 0.24        | 0.22        | 0.64        |
| Ammonium flux to NATZ**       | 0.19        | 0.40        | 0.04        | 0.82        |

\*, in the unit of meters below seafloor (mbsf)

\*\*\*, in the unit of  $\text{mmol m}^{-2} \text{yr}^{-1}$

**Table S2 Reaction network and rate laws**

| Reaction Name                  | Reaction | Reaction stoichiometry                                                                                                                                                                 | Rate expression                                                                                                       |
|--------------------------------|----------|----------------------------------------------------------------------------------------------------------------------------------------------------------------------------------------|-----------------------------------------------------------------------------------------------------------------------|
| Aerobic respiration            | $R_1$    | $\frac{1}{4}(CH_2O)(NH_3)_b + \frac{1}{4}O_2 + \frac{b}{4}H^+$<br>$\rightarrow \frac{1}{4}CO_2 + \frac{b}{4}NH_4^+ + \frac{1}{4}H_2O$                                                  | $(kfox * C_{TOC_1} + kfox_2 * C_{TOC_2}) * \frac{C_{O_2}}{C_{O_2} + h_1}$                                             |
| Heterotrophic denitrification  | $R_2$    | $\frac{1}{4}(CH_2O)(NH_3)_b + \frac{1}{5}NO_3^- + \left(\frac{1}{5} + \frac{b}{4}\right)H^+$<br>$\rightarrow \frac{1}{10}N_2 + \frac{1}{4}CO_2 + \frac{b}{4}NH_4^+ + \frac{7}{20}H_2O$ | $(kfox * C_{TOC_1} + kfox_2 * C_{TOC_2}) * \gamma * \frac{C_{NO_3^-}}{C_{NO_3^-} + h_2}$                              |
| Dissimilatory Mn(IV) reduction | $R_3$    | $\frac{1}{4}(CH_2O)(NH_3)_b + \frac{1}{2}MnO_2 + \left(1 + \frac{b}{4}\right)H^+$<br>$\rightarrow \frac{1}{2}Mn^{2+} + \frac{1}{4}CO_2 + \frac{b}{4}NH_4^+ + \frac{3}{4}H_2O$          | $(kfox * C_{TOC_1} + kfox_2 * C_{TOC_2}) * \gamma * \frac{h_2}{C_{NO_3^-} + h_2} * \frac{C_{MnO_2}}{C_{MnO_2} + h_3}$ |
| Nitrification                  | $R_4$    | $\frac{1}{8}NH_4^+ + \frac{1}{4}O_2 \rightarrow \frac{1}{8}NO_3^- + \frac{1}{4}H^+ + \frac{1}{8}H_2O$                                                                                  | $k_4 * C_{NH_4^+} * C_{O_2}$                                                                                          |
| Mn oxidation                   | $R_5$    | $\frac{1}{2}Mn^{2+} + \frac{1}{4}O_2 + \frac{1}{2}H_2O \rightarrow \frac{1}{2}MnO_2 + H^+$                                                                                             | $k_5 * C_{Mn} * C_{O_2}$                                                                                              |
| Anammox                        | $R_6$    | $\frac{1}{6}NH_4^+ + \frac{1}{6}NO_3^- + \frac{1}{3}H^+ \rightarrow \frac{1}{6}N_2 + \frac{1}{2}H_2O$                                                                                  | $k_6 * C_{NH_4^+} * C_{NO_3^-} * \gamma$                                                                              |

$\gamma = \frac{h_1}{(h_1 + C_{O_2})}$ , represents in the oxygen inhibition term.

**Table S3. Species and boundary conditions (BC) at the sediment-water interface (SWI) used in the reaction-transport model**

| Name                      | Symbol                        | BC SWI Type (Unit)                           | BC SWI Value |         |         |         |
|---------------------------|-------------------------------|----------------------------------------------|--------------|---------|---------|---------|
|                           |                               |                                              | GC08         | GC09    | GC04    | GC05    |
| Total organic carbon flux | CH <sub>2</sub> O             | Flux (mol m <sup>-2</sup> yr <sup>-1</sup> ) | 9.30E-3      | 1.42E-2 | 1.09E-2 | 2.01E-2 |
| Manganese oxide flux      | MnO <sub>2</sub>              | Flux (mol m <sup>-2</sup> yr <sup>-1</sup> ) | 2E-6         | 2.0E-5  | 4.0E-5  | 1.0E-5  |
| Oxygen                    | O <sub>2</sub>                | Concentration (μM)                           | 165          | 225     | 205     | 160     |
| Ammonium                  | NH <sub>4</sub> <sup>+</sup>  | Concentration (μM)                           | 0.1          | 0.1     | 0.1     | 0.1     |
| Nitrate                   | NO <sub>3</sub> <sup>-</sup>  | Concentration (μM)                           | 25           | 21      | 21      | 30      |
| Manganese                 | Mn(II)                        | Concentration (μM)                           | 0.1          | 0.1     | 0.1     | 0.1     |
| DIC                       | HCO <sub>3</sub> <sup>-</sup> | Concentration (mM)                           | 2.5          | 2.1     | 2.2     | 2.18    |

**Table S4. Parameter values used in the reaction-transport model**

| Name                                                        | Symbol        | Unit                              | GC08   | GC09   | GC04   | GC05   | Source | Range given by source,<br>[Values used by source] |
|-------------------------------------------------------------|---------------|-----------------------------------|--------|--------|--------|--------|--------|---------------------------------------------------|
| Sediment domain                                             | L             | cm                                | 500    | 350    | 500    | 600    | --     | --                                                |
| Solid burial velocity at compaction                         | $\omega$      | cm ky <sup>-1</sup>               | 2      | 5      | 2      | 2.5    | a      | 2, [--]                                           |
| TOC degradation constant C <sub>1</sub>                     | kfox          | 1 yr <sup>-1</sup>                | 6.9E-5 | 6.5E-5 | 6.5E-5 | 9.0E-5 | b      | 1.0E-03 - 1.0E-01,<br>[1.0E-03 - 1.0E-01]         |
| TOC degradation constant C <sub>2</sub>                     | kfox2         | 1 yr <sup>-1</sup>                | 5.0E-6 | 2.0E-5 | 2.0E-6 | 8.0E-6 | b      | 1.0E-06 - 7.0E-06,<br>[1.0E-06 - 7.0E-06]         |
| Nitrification rate constant                                 | $k_4$         | mM <sup>-1</sup> yr <sup>-1</sup> | 150    | 150    | 300    | 150    | c      | 5-100, [5-100]                                    |
| Mn oxidation rate constant                                  | $k_5$         | mM <sup>-1</sup> yr <sup>-1</sup> | 110    | 110    | 110    | 110    | e      | 110, [110]                                        |
| Anammox rate constant                                       | $k_6$         | mM <sup>-1</sup> yr <sup>-1</sup> | 50     | 50     | 50     | 150    | f      | --                                                |
| Bioturbation coefficient                                    | $D_{b,0}$     | cm yr <sup>-1</sup>               | 0      | 0      | 0      | 0      | --     | --                                                |
| Biomixing half depth                                        | $z_{mix}$     | cm                                | 3      | 3      | 3      | 3      | e      | 5, [5]                                            |
| Biomixing attenuation                                       | $Z_{att}$     | cm                                | 3      | 3      | 3      | 3      | e      | 5, [5]                                            |
| Bioirrigation coefficient                                   | $\alpha_0$    | yr <sup>-1</sup>                  | 0      | 0      | 0      | 0      | --     | --                                                |
| $R_1$ O <sub>2</sub> inhibition concentration               | $h_1$         | μM                                | 10     | 10     | 15     | 10     | d      | 1-30, [20]                                        |
| $R_2$ NO <sub>3</sub> <sup>-</sup> inhibition concentration | $h_2$         | μM                                | 20     | 38     | 4      | 5      | d      | 4-80, [2]                                         |
| $R_3$ MnO <sub>2</sub> inhibition concentration             | $h_3$         | μmol g <sup>-1</sup>              | 10     | 10     | 10     | 10     | d      | 4-32, [4,32]                                      |
| Porosity at sediment surface                                | $\phi_0$      | --                                | 0.8    | 0.8    | 0.65   | 0.8    | g      | --                                                |
| Porosity at infinite depth                                  | $\phi_\infty$ | --                                | 0.55   | 0.6    | 0.55   | 0.6    | g      | --                                                |
| Porosity attenuation coefficient                            | $\alpha_0$    | cm <sup>-1</sup>                  | 0.01   | 0.01   | 0.01   | 0.01   | f      | --                                                |

<sup>a</sup> Eldholm and Windisch (1974)

<sup>b</sup> Volz et al, (2018).

<sup>c</sup> Mewes et al., (2016).

<sup>d</sup> Wang and Van Cappellen (1996).

<sup>e</sup> Mogollón et al. (2016)

<sup>f</sup> Constrained by the model.

<sup>g</sup> Measured in this study.

**Table S5. Root mean square error (RMSE) of porewater solutes<sup>a</sup>**

| <b>Core ID</b> | <b>O<sub>2</sub></b><br><b>[<math>\mu</math>M]</b> | <b>Mn(II)</b><br><b>[<math>\mu</math>M]</b> | <b>NO<sub>3</sub><sup>-</sup></b><br><b>[<math>\mu</math>M]</b> | <b>NH<sub>4</sub><sup>+</sup></b><br><b>[<math>\mu</math>M]</b> | <b>DIC</b><br><b>[mM]</b> |
|----------------|----------------------------------------------------|---------------------------------------------|-----------------------------------------------------------------|-----------------------------------------------------------------|---------------------------|
| GC08           | 8.1                                                | 3.7                                         | 1.8                                                             | 4.6                                                             | 0.03                      |
| GC09           | 27.2                                               | 7.9                                         | 3.1                                                             | 1.2                                                             | 0.07                      |
| GC04           | 34.8                                               | 14.3                                        | 2.3                                                             | 0.5                                                             | 0.07                      |
| GC05           | 10.0                                               | 8.0                                         | 1.1                                                             | 3.4                                                             | 0.08                      |

<sup>a</sup> Error is calculated not for any single data point, but for the whole simulated concentration profile.

**Table S6. Summary statistics of *Candidatus Scalindua* genomes**

|                             | <b><i>Ca. S. sediminis</i></b> | <b><i>Ca. S. rubra</i></b> | <b><i>Ca. S. profunda</i></b> | <b><i>Ca. S. brodae</i></b> | <b><i>Ca. S. japonica</i></b> | <b><i>Ca. S. AMX11</i></b> |
|-----------------------------|--------------------------------|----------------------------|-------------------------------|-----------------------------|-------------------------------|----------------------------|
| Completeness*               | 95.5%                          | 92.5%                      | 94.2%                         | 92.7%                       | 95.5%                         | 96.6%                      |
| Contamination*              | 4.6%                           | 5.1%                       | 5.4%                          | 2.3%                        | 3.4%                          | 4.6%                       |
| Strain heterogeneity*       | 0%                             | 0%                         | 75%                           | 0%                          | 0%                            | 25%                        |
| Total length (base pairs)   | 2,955,644                      | 5,194,263                  | 4,176,727                     | 4,084,168                   | 4,812,853                     | 4,593,657                  |
| GC content                  | 38.3%                          | 37.3%                      | 40.3%                         | 39.6%                       | 38.8%                         | 41.1%                      |
| Number of scaffolds         | 71                             | 443                        | 3053                          | 282                         | 47                            | 121                        |
| Number of contigs           | 83                             | 443                        | 4756                          | 282                         | 47                            | 121                        |
| N50 of contigs              | 70,308                         | 22,837                     | 1,173                         | 33,252                      | 219,109                       | 92,628                     |
| Number of coding sequences† | 2,879                          | 5,482                      | 4,714                         | 4,178                       | 4,343                         | 4095                       |
| Coding density              | 84.1%                          | 80.1%                      | 99.4%                         | 83.9%                       | 84.1%                         | 81.6%                      |
| Average coverage            | 116.7                          | --                         | --                            | --                          | --                            | --                         |

\*Based on lineage-specific marker sets determined with CheckM. †Inferred with Prodigal. ‡Estimated from the proportion of reads mapped to the genome. --, No data.

**Dataset S1 (separate file).** Annotation of *Ca. S. sediminis* genes discussed in this study.

**Dataset S2 (separate file).** Measured geochemical profiles.

## SI References

### REFERENCES

1. S. Arndt et al., *Quantifying the degradation of organic matter in marine sediments: A review and synthesis. Earth-Science Reviews* **123**, 53-86 (2013).
2. P. Regnier et al., *Quantitative analysis of anaerobic oxidation of methane (AOM) in marine sediments: a modeling perspective. Earth-Science Reviews* **106**, 105-130 (2011).
3. J. M. Mogollón, K. Mewes, S. Kasten, *Quantifying manganese and nitrogen cycle coupling in manganese - rich, organic carbon - starved marine sediments: Examples from the Clarion - Clipperton fracture zone. Geophysical Research Letters* **43**, 7114-7123 (2016).
4. K. Mewes et al., *Diffusive transfer of oxygen from seamount basaltic crust into overlying sediments: An example from the Clarion–Clipperton Fracture Zone. Earth and Planetary Science Letters* **433**, 215-225 (2016).
5. J. B. Volz et al., *Natural spatial variability of depositional conditions, biogeochemical processes and element fluxes in sediments of the eastern Clarion-Clipperton Zone, Pacific Ocean. Deep Sea Research Part I: Oceanographic Research Papers* **140**, 159-172 (2018).
6. R. Zhao, B. Hannisdal, J. M. Mogollon, S. L. Jørgensen, *Nitrifier abundance and diversity peak at deep redox transition zones. Scientific Reports* **9**, 8633 (2019).
7. D. E. LaRowe et al., *The fate of organic carbon in marine sediments - New insights from recent data and analysis. Earth-Science Reviews* **204**, 103146 (2020).
8. K. Soetaert, T. Petzoldt, *Inverse modelling, sensitivity and Monte Carlo analysis in R using package FME. Journal of statistical software* **33**, 1-28 (2010).
9. D. C. Reed, C. K. Algar, J. A. Huber, G. J. Dick, *Gene-centric approach to integrating environmental genomics and biogeochemical models. Proceedings of the National Academy of Sciences of the United States of America* **111**, 1879-1884 (2014).
10. J. Seeberg-Elverfeldt, M. Schlüter, T. Feseker, M. Kölling, *Rhizon sampling of pore waters near the sediment/water interface of aquatic systems. Limnology and oceanography: Methods* **3**, 361-371 (2005).
11. L. Sororzano, *Determination of ammonia in natural waters by the phenolhypochlorite method. Limnol Oceanogr* **14**, 799-801 (1969).
12. M. Badea et al., *New electrochemical sensors for detection of nitrites and nitrates. Journal of Electroanalytical Chemistry* **509**, 66-72 (2001).



13. M. Stoll, K. Bakker, G. Nobbe, R. Haese, Continuous-flow analysis of dissolved inorganic carbon content in seawater. *Analytical Chemistry* **73**, 4111-4116 (2001).
14. K. Soetaert, T. Petzoldt, F. Meysman (2010) Marelac: Tools for aquatic sciences. (R package version), pp <https://cran.r-project.org/web/packages/marelac/index.html>.
15. B. B. Jørgensen, Comparison of methods for the quantification of bacterial sulfate reduction in coastal marine sediments. II. calculation from mathematical models. *Geomicrobiology Journal* **1**, 29-47 (1978).
16. K. Soetaert, F. Meysman, Reactive transport in aquatic ecosystems: Rapid model prototyping in the open source software R. *Environmental Modelling & Software* **32**, 49-60 (2012).
17. K. Soetaert, T. Petzoldt, R. W. Setzer, Solving differential equations in R: package deSolve. *Journal of Statistical Software* **33** (2010).
18. R. C. Aller, P. O. J. Hall, P. D. Rude, J. Y. Aller, Biogeochemical heterogeneity and suboxic diagenesis in hemipelagic sediments of the Panama Basin. *Deep-Sea Research Part I-Oceanographic Research Papers* **45**, 133-165 (1998).
19. J. W. Murray, K. M. Kuivila, Organic matter diagenesis in the northeast Pacific: transition from aerobic red clay to suboxic hemipelagic sediments. *Deep-Sea Research Part a-Oceanographic Research Papers* **37**, 59-80 (1990).
20. S. Grandel, D. Rickert, M. Schluter, K. Wallmann, Pore-water distribution and quantification of diffusive benthic fluxes of silicic acid, nitrate and phosphate in surface sediments of the deep Arabian Sea. *Deep-Sea Research Part I-Topical Studies in Oceanography* **47**, 2707-2734 (2000).
21. T. Nunoura et al., Molecular biological and isotopic biogeochemical prognoses of the nitrification-driven dynamic microbial nitrogen cycle in hadopelagic sediments. *Environmental Microbiology* **15**, 3087-3107 (2013).
22. S. Emerson et al., Early diagenesis in sediments from the Eastern Equatorial Pacific 1: pore water nutrient and carbonate results. *Earth and Planetary Science Letters* **49**, 57-80 (1980).
23. H. D. Schulz, A. Dahmke, U. Schinzel, K. Wallmann, M. Zabel, Early diagenetic processes, fluxes, and reaction rates in sediments of the South Atlantic. *Geochimica et Cosmochimica Acta* **58**, 2041-2060 (1994).
24. P. N. Froelich et al., Early oxidation of organic-matter in pelagic sediments of the Eastern Equatorial Atlantic: suboxic diagenesis. *Geochimica et Cosmochimica Acta* **43**, 1075-1090 (1979).
25. M. Bender et al., Organic-carbon oxidation and benthic nitrogen and silica dynamics in San Clemente Basin: a continental borderland site. *Geochimica et Cosmochimica Acta* **53**, 685-697 (1989).
26. D. E. Canfield, B. Thamdrup, J. W. Hansen, The anaerobic degradation of organic matter in Danish coastal sediments: iron reduction, manganese reduction, and sulfate reduction. *Geochimica et Cosmochimica Acta* **57**, 3867-3883 (1993).

27. P. Engstrom, C. R. Penton, A. H. Devol, *Anaerobic ammonium oxidation in deep-sea sediments off the Washington margin. Limnology and Oceanography* **54**, 1643-1652 (2009).
28. A. Jaeschke et al., *Molecular evidence for anaerobic ammonium-oxidizing (anammox) bacteria in continental shelf and slope sediments off northwest Africa. Limnology and Oceanography* **55**, 365-376 (2010).
29. M. L. Bender, K. A. Fanning, P. N. Froelich, G. R. Heath, V. Maynard, *Interstitial nitrate profiles and oxidation of sedimentary organic matter in Eastern Equatorial Atlantic. Science* **198**, 605-609 (1977).
30. T. Freudenthal, T. Wagner, F. Wenzhofer, M. Zabel, G. Wefer, *Early diagenesis of organic matter from sediments of the eastern subtropical Atlantic: Evidence from stable nitrogen and carbon isotopes. Geochimica et Cosmochimica Acta* **65**, 1795-1808 (2001).
31. J. P. Christensen, G. T. Rowe, *Nitrification and oxygen consumption in northwest Atlantic deep-sea sediments. Journal of Marine Research* **42**, 1099-1116 (1984).
32. W. B. F. Ryan et al., *Global multi-resolution topography synthesis. Geochemistry Geophysics Geosystems* **10**, Q03014 (2009).
33. J. M. Dick, *Calculation of the relative metastabilities of proteins using the CHNOSZ software package. Geochemical Transactions* **9**, 10 (2008).
34. D. E. LaRowe, J. P. Amend, *Catabolic rates, population sizes and doubling/replacement times of microorganisms in natural settings. American Journal of Science* **315**, 167-203 (2015).
35. L. S. Chong, M. G. Prokopenko, W. M. Berelson, A. Townsend-Small, J. McManus, *Nitrogen cycling within suboxic and anoxic sediments from the continental margin of Western North America. Marine Chemistry* **128**, 13-25 (2012).
36. R. Barnes, K. Bertine, E. Goldberg, *N<sub>2</sub>: Ar, nitrification and denitrification in southern California borderland basin sediments. Limnology and Oceanography* **20**, 962-970 (1975).
37. R. C. Edgar, *Search and clustering orders of magnitude faster than BLAST. Bioinformatics* **26**, 2460-2461 (2010).
38. R. C. Edgar, *UPARSE: highly accurate OTU sequences from microbial amplicon reads. Nature Methods* **10**, 996-998 (2013).
39. A. Lanzen et al., *CREST - Classification resources for environmental sequence tags. PLoS One* **7**, e49334 (2012).
40. H. Wickham, *ggplot2: elegant graphics for data analysis (Springer, 2016)*.
41. M. Li, Y. Hong, M. G. Klotz, J.-D. Gu, *A comparison of primer sets for detecting 16S rRNA and hydrazine oxidoreductase genes of anaerobic ammonium-oxidizing bacteria in marine sediments. Applied Microbiology and Biotechnology* **86**, 781-790 (2010).
42. S. L. Jørgensen, R. Zhao, *Microbial inventory of deeply buried oceanic crust from a young ridge flank. Frontiers in Microbiology* **7**, 820 (2016).

43. S. F. Stoddard, B. J. Smith, R. Hein, B. R. K. Roller, T. M. Schmidt, *rrnDB: improved tools for interpreting rRNA gene abundance in bacteria and archaea and a new foundation for future development. Nucleic Acids Research* **43**, D593-D598 (2015).
44. H. C. Berg, *The rotary motor of bacterial flagella. Annual Review of Biochemistry* **72**, 19-54 (2003).
45. B. Kartal et al., *Molecular mechanism of anaerobic ammonium oxidation. Nature* **479**, 127-U159 (2011).
46. S. Andrews, *FastQC: a quality control tool for high throughput sequence data. <https://www.bioinformatics.babraham.ac.uk/projects/fastqc/> (2010).*
47. A. M. Bolger, M. Lohse, B. Usadel, *Trimmomatic: a flexible trimmer for Illumina sequence data. Bioinformatics* **30**, 2114-2120 (2014).
48. D. H. Li, C. M. Liu, R. B. Luo, K. Sadakane, T. W. Lam, *MEGAHIT: an ultra-fast single-node solution for large and complex metagenomics assembly via succinct de Bruijn graph. Bioinformatics* **31**, 1674-1676 (2015).
49. Y. W. Wu, B. A. Simmons, S. W. Singer, *MaxBin 2.0: an automated binning algorithm to recover genomes from multiple metagenomic datasets. Bioinformatics* **32**, 605-607 (2016).
50. D. H. Parks, M. Imelfort, C. T. Skennerton, P. Hugenholtz, G. W. Tyson, *CheckM: assessing the quality of microbial genomes recovered from isolates, single cells, and metagenomes. Genome Research* **25**, 1043-1055 (2015).
51. B. K. Seah, H. R. Gruber-Vodicka, *gbtools: interactive visualization of metagenome bins in R. Frontiers in Microbiology* **6**, 1451 (2015).
52. B. Bushnell (2014) *BBMap: a fast, accurate, splice-aware aligner. (Ernest Orlando Lawrence Berkeley National Laboratory, Berkeley, CA (US)).*
53. S. Kumar, M. Jones, G. Koutsovoulos, M. Clarke, M. Blaxter, *Blobology: exploring raw genome data for contaminants, symbionts and parasites using taxon-annotated GC-coverage plots. Frontiers in Genetics* **4**, 237 (2013).
54. S. F. Altschul et al., *Gapped BLAST and PSI-BLAST: a new generation of protein database search programs. Nucleic Acids Research* **25**, 3389-3402 (1997).
55. T. Seemann (2015) *Barrnap. Online: <https://github.com/tseemann/barrnap>. (Github).*
56. T. Rognes, T. Flouri, B. Nichols, C. Quince, F. Mahe, *VSEARCH: a versatile open source tool for metagenomics. PeerJ* **4**, e2584 (2016).
57. C. Quast et al., *The SILVA ribosomal RNA gene database project: improved data processing and web-based tools. Nucleic Acids Research* **41**, D590-D596 (2013).
58. A. Bankevich et al., *SPAdes: A new genome assembly algorithm and its applications to single-cell sequencing. Journal of Computational Biology* **19**, 455-477 (2012).
59. B. K. B. Seah, H. R. Gruber-Vodicka, *gbtools: Interactive Visualization of Metagenome Bins in R. Frontiers in Microbiology* **6**, 1451 (2015).

60. D. Hyatt et al., *Prodigal: prokaryotic gene recognition and translation initiation site identification*. *BMC Bioinformatics* **11**, 119 (2010).
61. T. Seemann, *Prokka: rapid prokaryotic genome annotation*. *Bioinformatics* **30**, 2068-2069 (2014).
62. J. Huerta-Cepas et al., *eggNOG 4.5: a hierarchical orthology framework with improved functional annotations for eukaryotic, prokaryotic and viral sequences*. *Nucleic Acids Research* **44**, D286-D293 (2016).
63. M. Kanehisa, Y. Sato, K. Morishima, *BlastKOALA and GhostKOALA: KEGG Tools for Functional Characterization of Genome and Metagenome Sequences*. *Journal of Molecular Biology* **428**, 726-731 (2016).
64. M. Kanehisa, S. Goto, Y. Sato, M. Furumichi, M. Tanabe, *KEGG for integration and interpretation of large-scale molecular data sets*. *Nucleic acids research* **40**, D109-D114 (2011).
65. R. Sorek et al., *Genome-wide experimental determination of barriers to horizontal gene transfer*. *Science* **318**, 1449-1452 (2007).
66. J. H. Campbell et al., *UGA is an additional glycine codon in uncultured SR1 bacteria from the human microbiota*. *Proceedings of the National Academy of Sciences of the United States of America* **110**, 5540-5545 (2013).
67. A. M. Eren et al., *Anvi'o: an advanced analysis and visualization platform for 'omics data*. *PeerJ* **3**, e1319 (2015).
68. R. C. Edgar, *MUSCLE: multiple sequence alignment with high accuracy and high throughput*. *Nucleic Acids Research* **32**, 1792-1797 (2004).
69. S. Capella-Gutierrez, J. M. Silla-Martinez, T. Gabaldon, *trimAl: a tool for automated alignment trimming in large-scale phylogenetic analyses*. *Bioinformatics* **25**, 1972-1973 (2009).
70. L. T. Nguyen, H. A. Schmidt, A. von Haeseler, B. Q. Minh, *IQ-TREE: A fast and effective stochastic algorithm for estimating maximum-likelihood phylogenies*. *Molecular Biology and Evolution* **32**, 268-274 (2015).
71. S. Kalyaanamoorthy, B. Q. Minh, T. K. F. Wong, A. von Haeseler, L. S. Jermiin, *ModelFinder: fast model selection for accurate phylogenetic estimates*. *Nature Methods* **14**, 587-589 (2017).
72. D. T. Hoang, O. Chernomor, A. von Haeseler, B. Q. Minh, L. S. Vinh, *UFBoot2: Improving the Ultrafast Bootstrap Approximation*. *Molecular Biology and Evolution* **35**, 518-522 (2017).
73. K. Katoh, D. M. Standley, *MAFFT multiple sequence alignment software version 7: improvements in performance and usability*. *Molecular Biology and Evolution* **30**, 772-780 (2013).
74. H. Koch et al., *Expanded metabolic versatility of ubiquitous nitrite-oxidizing bacteria from the genus Nitrospira*. *Proceedings of the National Academy of Sciences of the United States of America* **112**, 11371-11376 (2015).

75. M. Palatinszky et al., Cyanate as an energy source for nitrifiers. *Nature* **524**, 105-108 (2015).
76. K. Kitzinger et al., Characterization of the first "Candidatus Nitrotoga" isolate reveals metabolic versatility and separate evolution of widespread nitrite-oxidizing bacteria. *mBio* **9**, e01186-01118 (2018).
77. H. Daims et al., Complete nitrification by *Nitrospira* bacteria. *Nature* **528**, 504-509 (2015).
78. D. R. Speth et al., Draft genome of *Scalindua rubra*, obtained from the interface above the discovery deep brine in the Red Sea, sheds light on potential salt adaptation strategies in anammox bacteria. *Microbial Ecology* **74**, 1-5 (2017).
79. D. R. Speth et al., Draft genome sequence of anammox bacterium "Candidatus *Scalindua brodae*," obtained using differential coverage binning of sequencing data from two reactor enrichments. *Genome Announcements* **3**, e01415-01414 (2015).
80. M. Oshiki et al., Genetic diversity of marine anaerobic ammonium-oxidizing bacteria as revealed by genomic and proteomic analyses of "Candidatus *Scalindua japonica*". *Environmental Microbiology Reports* **9**, 550-561 (2017).
81. M. Ali, D. R. Shaw, P. E. Saikaly, Draft genome sequence of a novel marine anaerobic ammonium-oxidizing bacterium, "Candidatus *Scalindua* sp.". *Microbiology Resource Announcements* **8**, e00297-00219 (2019).
82. R. L. Tatusov, E. V. Koonin, D. J. Lipman, A genomic perspective on protein families. *Science* **278**, 631-637 (1997).
83. I. Lagkouvardos et al., IMNGS: A comprehensive open resource of processed 16S rRNA microbial profiles for ecology and diversity studies. *Scientific Reports* **6**, 33721 (2016).
84. M. Strous et al., Missing lithotroph identified as new planctomycete. *Nature* **400**, 446-449 (1999).
85. T. Awata et al., Physiological characterization of an anaerobic ammonium-oxidizing bacterium belonging to the "Candidatus *Scalindua*" group. *Appl. Environ. Microbiol.* **79**, 4145-4148 (2013).
